# Supplementary material for: Early childhood cognitive development is affected by interactions among illness, diet, enteropathogens and the home environment: findings from the MAL-ED birth cohort study
Source: PubMed Central journal article supplement (PMC6058175; doi:10.1136/bmjgh-2018-000752), 2018-07-23
Supplement: bmjgh-2018-000752supp001.pdf [file bmjgh-2018-000752supp001.pdf]

## Supplementary Materials

**Supplementary Table 1: Identity and representation of variables hypothesized to be related to child development\***

| Domain                   | Variable                                          | Representation                                                                                                                   | Included (Y/N)                                                                                                                                 | Reason not in final model                                                                                                                                                                                           |
|--------------------------|---------------------------------------------------|----------------------------------------------------------------------------------------------------------------------------------|------------------------------------------------------------------------------------------------------------------------------------------------|---------------------------------------------------------------------------------------------------------------------------------------------------------------------------------------------------------------------|
| SES                      | Crowding                                          | Mean # of people per room in household at 24 months                                                                              | N                                                                                                                                              | Redundancy with the Healthy/Safe environment variable and site                                                                                                                                                      |
|                          | <u>Child</u> Cleanliness                          | Cleanliness Score (Factor 3 from HOME averaged across 6 and 24 months)                                                           | N                                                                                                                                              | Redundancy with Health/Safe environment variable                                                                                                                                                                    |
|                          | Environmental Safety & Healthfulness              | Safety/Health Score (Factor 2 from HOME averaged across 6 and 24 months)                                                         | Y                                                                                                                                              |                                                                                                                                                                                                                     |
| Intake                   | Breastfeeding                                     | Proportion of days exclusively or partially breastfed from 0-6 months                                                            | N                                                                                                                                              | Unrelated to the cognitive development outcomes and other variables of interest                                                                                                                                     |
|                          |                                                   | % days with breastmilk in diet between 6-24 months                                                                               | N                                                                                                                                              | Unrelated to the cognitive development outcomes and other variables of interest                                                                                                                                     |
|                          |                                                   | Duration of breastfeeding to 24 months                                                                                           | N                                                                                                                                              | Unrelated to the cognitive development outcomes and other variables of interest                                                                                                                                     |
|                          | Complementary Feeding                             | Average of monthly protein intake from meat/fish/poultry from 9-24 months                                                        | Y                                                                                                                                              |                                                                                                                                                                                                                     |
|                          |                                                   | Average of monthly vitamin B12 intake from 9-24 months                                                                           | N                                                                                                                                              | High correlations with vitamin B6 intake and limited number of variables that can be included in the model; because vitamin B6 had a stronger association with the outcome, it was retained in place of vitamin B12 |
|                          |                                                   | Average of monthly vitamin B6 intake from 9-24 months                                                                            | Y                                                                                                                                              |                                                                                                                                                                                                                     |
|                          |                                                   | Average of monthly zinc intake from 9-24 months                                                                                  | N                                                                                                                                              | Relatively lower relationship with variables of interest, some redundancy with other variables, and limited number of variables that can be included in the model                                                   |
|                          | Average of monthly folate intake from 9-24 months | Y                                                                                                                                |                                                                                                                                                |                                                                                                                                                                                                                     |
|                          | Average of monthly iron intake from 9-24 months   | N                                                                                                                                | Had biomarkers of iron status that were included in the model and thought to be more closely related to cognitive development than iron intake |                                                                                                                                                                                                                     |
| Micronutrient Status     | Hemoglobin Concentration                          | Average of altitude adjusted hemoglobin concentration (7, 15, 24 months)                                                         | Y                                                                                                                                              |                                                                                                                                                                                                                     |
|                          | Ferritin Concentration                            | Average of inflammation adjusted ferritin concentration (7, 15, 24 months)                                                       | N                                                                                                                                              | Relatively lower relationship with variables of interest, some redundancy with other variables, and limited number of variables that can be included in the model                                                   |
|                          | Transferrin Receptor Concentration                | Average of transferrin receptor concentration (7, 15, 24 months)                                                                 | N                                                                                                                                              | Relatively lower relationship with variables of interest, some redundancy with other variables, and limited number of variables that can be included in the model                                                   |
|                          | Zinc Concentration                                | Average of zinc concentration (7, 15, 24 months)                                                                                 | N                                                                                                                                              | High rates of missing data in S. Africa site; if included, it would necessitate dropping that site                                                                                                                  |
|                          | Iodine Excretion                                  | Average of urinary iodine excretion                                                                                              | N                                                                                                                                              | High rates of missing data                                                                                                                                                                                          |
| Environmental toxin      | Lead Concentration                                | Blood lead concentration (15 or 24 months)                                                                                       | N                                                                                                                                              | Data missing from Brazil and Peru sites; if included, it would necessitate dropping these two sites.                                                                                                                |
| Enteropathogen detection | Enteropathogens in Non-Diarrhoeal Stool           | Total number of enteropathogens from non-diarrhoeal stool samples divided by number of non-diarrhoeal stools tested to 24 months | Y                                                                                                                                              |                                                                                                                                                                                                                     |
|                          | Enteropathogens in Diarrhoeal Stool               | Total number of enteropathogens from diarrhoeal stool samples                                                                    | Y                                                                                                                                              |                                                                                                                                                                                                                     |

|                          |                              |                                                                                                                           |                |                                                                                 |
|--------------------------|------------------------------|---------------------------------------------------------------------------------------------------------------------------|----------------|---------------------------------------------------------------------------------|
| Gut Function             | Lactulose Mannitol           | divided by number of diarrhoeal stools tested to 24 months<br>Mean lactulose mannitol concentrations (3, 6, 9, 15 months) | N              | Unrelated to the cognitive development outcomes and other variables of interest |
|                          | Fecal Myeloperoxidase        | Mean concentration (monthly in year 1 and quarterly in year 2)                                                            | N              |                                                                                 |
|                          | Fecal Neopterin              | Mean concentration (monthly in year 1 and quarterly in year 2)                                                            | N              |                                                                                 |
|                          | Alpha-1-Antitrypsin          | Mean concentration (monthly in year 1 and quarterly in year 2)                                                            | N              |                                                                                 |
| Illness                  |                              | Total number of days of maternal report of fever divided by days of followup                                              | Y              | Unrelated to the cognitive development outcomes and other variables of interest |
|                          |                              | Total number of days of maternal report of vomiting divided by days of followup                                           | Y              |                                                                                 |
|                          |                              | Total number of days of ALRI divided by days of followup                                                                  | Y              |                                                                                 |
|                          |                              | Total number of days with diarrhoeal symptoms divided by days of followup                                                 | Y              |                                                                                 |
|                          | Alpha-1-acid glycoprotein    | Systemic inflammation                                                                                                     | N              |                                                                                 |
| Psychosocial Stimulation | Caregiver Responsivity       | Verbal and emotional responsivity of caregiver score (Factor 1 from HOME averaged across 6 and 24 months)                 | N              | Unrelated to the cognitive development outcomes and other variables of interest |
| Maternal Factors         | Maternal Reasoning Ability   | Total Raven's score after psychometric analyses                                                                           | Y              | SRQ scale was found to lack validity in Brazil and could not be used.           |
|                          | Maternal Depressive Symptoms | Average of total SRQ score after psychometric analyses across 1, 6, 15 and 24 months                                      | N <sup>1</sup> |                                                                                 |
| Anthropometry            | Weight                       | Weight for age Z-score <u>in the first 17 days of life</u>                                                                | Y <sup>2</sup> |                                                                                 |
| Child Development        | Cognitive Development        | Total Bayley cognitive development score after psychometric analyses (24 months)                                          | Y              |                                                                                 |

\*For specifics on data collection, please see the MAL-ED Supplement in Clinical and Infectious Diseases (2014, Volume 59).

<sup>1</sup>Maternal depressive symptoms were omitted from the model because inclusion would have necessitated the exclusion of the BRF site, thereby, reducing the sample size and impeding our ability to conduct more complex analyses (eg, indirect effects). However, we tested this variable separately in a more basic version of the baseline model (without indirect effects) and found that it did not meaningfully influence the model.

<sup>2</sup>Infants were divided into tertiles by weight in the first 17 days of life and models were run separately for the lowest tertile and the highest tertile.

**Supplementary Table 2: Model fit indices by site -- demographic variables\*, configural models**

| Model                                          | Model Fit Indices |     |       |      |
|------------------------------------------------|-------------------|-----|-------|------|
|                                                | $\chi^2$          | CFI | RMSEA | SRMR |
| Full Model Non-Diarrhoeal Pathogens            | 18.43             | .99 | .066  | .015 |
| Sex Invariance Model                           | 21.65             | .99 | .067  | .016 |
| BGD Invariance Model                           | 40.98             | .98 | .100  | .025 |
| BRF Invariance Model                           | 14.17             | .99 | .048  | .013 |
| INV Invariance Model (protein intake excluded) | 18.86             | .99 | .058  | .018 |
| PEL Invariance Model                           | 20.15             | .99 | .064  | .015 |
| PKN Invariance Model                           | 25.41             | .97 | .075  | .017 |
| SAV Invariance Model                           | 15.23             | .99 | .051  | .016 |

Abbreviations: Comparative Fit Index (CFI), Root Mean Square Error of Approximation (RMSEA), Standardized Root Mean Square Residual (SRMR)

\*The non-invariance of the model was attributable to: (a) site differences in the relationship between B vitamin intake and illness (negative relationship at all sites except for SAV where the relationship was neutral and non-significant), and (b) site differences in the relationship between protein intake and pathogen detection (negative relationship in BRF, PKN and SAV; positive relationship in BGD and PEL; neutral and nonsignificant relationship in INV), but not to any differences in the relationship between pathogen detection and cognitive development.

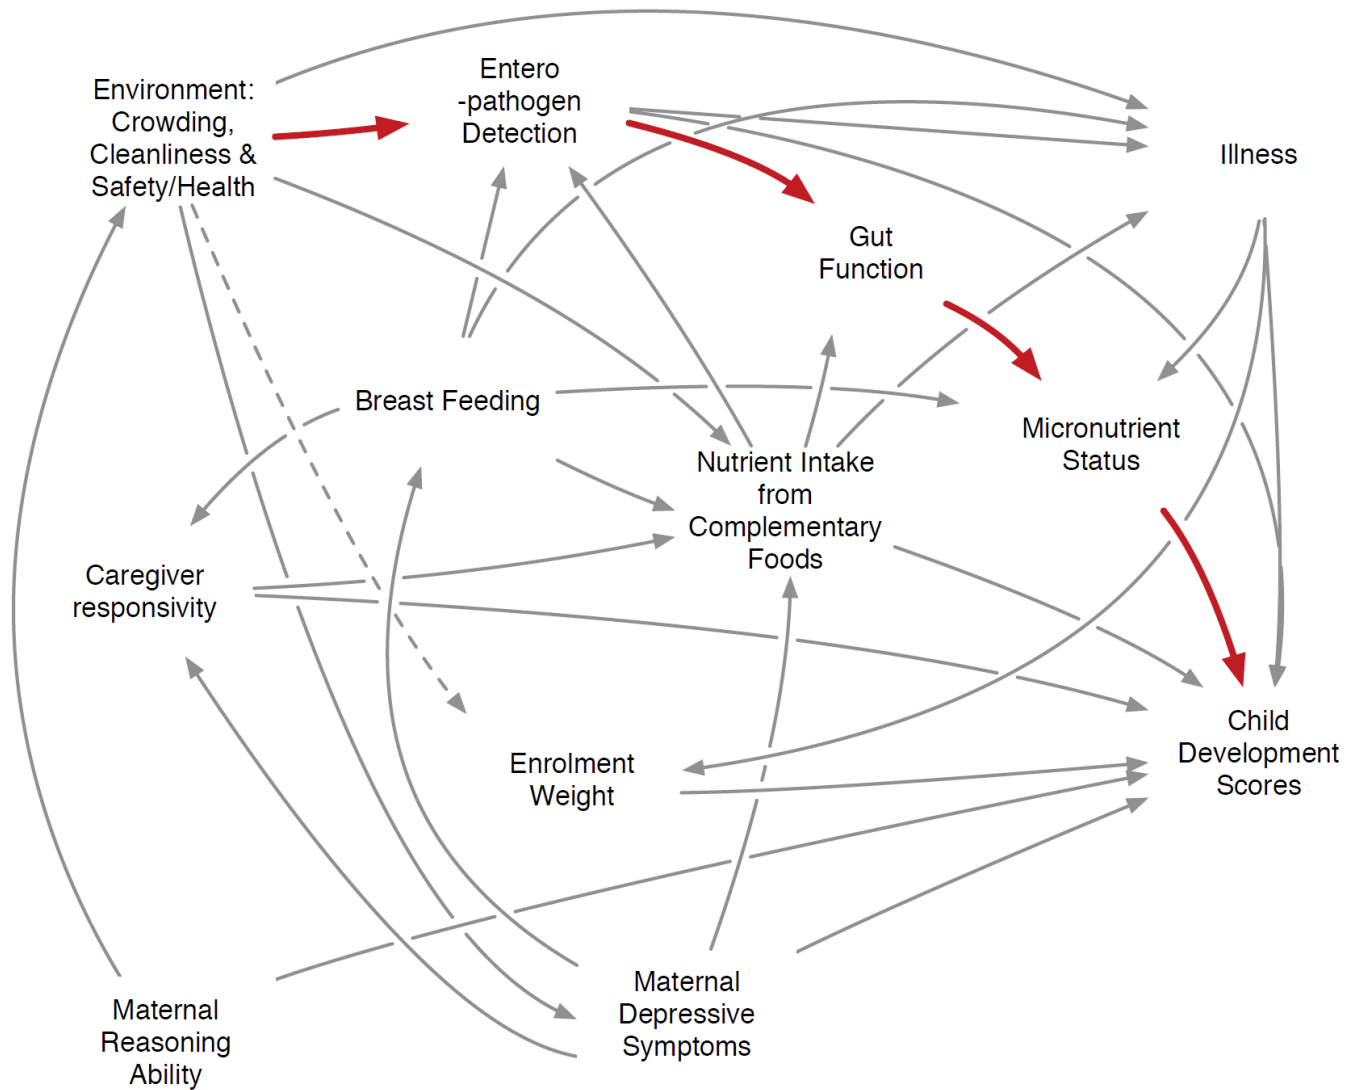

**Supplementary Figure 1: Hypothesized framework for the relation between enteropathogen detection and child cognitive development (main pathway of interest indicated by maroon arrows).**
